# Supplementary material
Source: publisher figshare collection journal article supplement (https://sage.figshare.com/ndownloader/files/16636673)

**Appendix A.** References of studies included in the meta-analysis (*n* = 19)

1. Anderson ES, Winett RA, Wojcik JR, Winett SG, Bowden T. A computerized social cognitive intervention for nutrition behavior: direct and mediated effects on fat, fiber, fruits, and vegetables, self-efficacy, and outcome expectations among food shoppers. *Ann Behav Med*. 2001;23(2):88-100.

2. Brookie, K. L., Mainvil, L. A., Carr, A. C., Vissers, M. C., & Conner, T. S. (2017). The development and effectiveness of an ecological momentary intervention to increase daily fruit and vegetable consumption in low-consuming young adults. *Appetite*, *108*, 32-41.

3. Buller DB, Woodall WG, Zimmerman DE, et al. Randomized trial on the 5 a day, the Rio Grande Way Website, a web-based program to improve fruit and vegetable consumption in rural communities. *J Health Commun*. 2008;13(3):230-249. doi: 10.1080/10810730801985285.

4. Campbell MK, Carbone E, Honess-Morreale L, Heisler-MacKinnon J, Demissie S, Farrell D. Randomized trial of a tailored nutrition education CD-ROM program for women receiving food assistance. *J Nutr Educ Behav*. 2004;36(2):58-66. doi: 10.1016/s1499-4046(06)60134-6

5. Carfora, V., Caso, D., & Conner, M. (2016). Randomized controlled trial of a messaging intervention to increase fruit and vegetable intake in adolescents: Affective versus instrumental messages. *British journal of health psychology*, *21*(4), 937-955.

6. Ezendam NPM, Brug J, Oenema A. Evaluation of the Web-based computer-tailored FATaintPHAT intervention to promote energy balance among adolescents: results from a school cluster randomized trial. *Arch Pediatr Adolesc Med*. 2012;166(3):248-255. doi: 10.1001/archpediatrics.2011.204

7. Fassnacht DB, Ali K, Silva C, Gonçalves S, Machado PPP. Use of text messaging services to promote health behaviors in children. *J Nutr Educ Behav*. 2015;47(1):75-80. doi: 10.1016/j.jneb.2014.08.006

8. Franko DL, Jenkins A, Rodgers RF. Toward reducing risk for eating disorders and obesity in Latina college women. *J Couns Dev*. 2012;90(3):298-307. doi: 10.1002/j.1556-6676.2012.00038.x

9. Irvine AB, Ary D V, Grove DA, Gilfillan‐Morton L. The effectiveness of an interactive multimedia program to influence eating habits. *Health Educ Res*. 2004;19(3):290-305. doi: 10.1093/her/cyg027

10. LaChausse RG. My student body: effects of an internet-based prevention program to decrease obesity among college students. *J Am Coll Heal*. 2012;60(4):324-330. doi: 10.1080/07448481.2011.623333

11. Mangunkusumo RT, Brug J, de Koning HJ, van der Lei J, Raat H. School-based internet-tailored fruit and vegetable education combined with brief counselling increases children’s awareness of intake levels. *Public Health Nutr*. 2007;10(3):273-279. doi: 10.1017/S1368980007246671

12. Mouttapa M, Robertson TP, McEligot AJ, et al. The personal nutrition planner: a 5-week, computer-tailored intervention for women. *J Nutr Educ Behav*. 2011;43(3):165-172. doi: 10.1016/j.jneb.2010.08.010

13. Nyström, C. D., Sandin, S., Henriksson, P., Henriksson, H., Maddison, R., & Löf, M. (2018). A 12-month follow-up of a mobile-based (mHealth) obesity prevention intervention in pre-school children: the MINISTOP randomized controlled trial. *BMC public health*, *18*(1), 658.

14. Oenema A, Tan F, Brug J. Short-term efficacy of a web-based computer-tailored nutrition intervention: main effects and mediators. *Ann Behav Med*. 2005;29(1):54-63. doi: 10.1207/s15324796abm2901_8

15. Papadaki A, Scott JA. The Mediterranean eating in Scotland experience project: evaluation of an Internet-based intervention promoting the Mediterranean diet. *Br J Nutr*. 2005;94(2):290-298. doi: 10.1079/bjn20051476

16. Plaete J, De Bourdeaudhuij I, Verloigne M, Crombez G. Acceptability, feasibility and effectiveness of an eHealth behaviour intervention using self-regulation:“MyPlan.” *Patient Educ Couns*. 2015;98(12):1617-1624. doi: 10.1016/j.pec.2015.07.014

17. Sharma S V, Shegog R, Chow J, et al. Effects of The Quest to Lava Mountain computer game on dietary and physical activity behaviors of elementary school children: a pilot group-randomized controlled trial. *J Acad Nutr Diet*. 2015;115(8):1260-1271. doi: 10.1016/j.jand.2015.02.022

18. Stevens VJ, Glasgow RE, Toobert DJ, Karanja N, Smith KS. One-year results from a brief, computer-assisted intervention to decrease consumption of fat and increase consumption of fruits and vegetables. *Prev Med (Baltim)*. 2003;36(5):594-600. doi: 10.1016/s0091-7435(03)00019-7

19. Winett RA, Roodman AA, Winett SG, Bajzek W, Rovniak LS, Whiteley JA. The effects of the Eat4Life Internet-based health behavior program on the nutrition and activity practices of high school girls. *J Gender, Cult Heal*. 1999;4(3):239-254.

**Appendix B.** References of studies excluded by category (*n* = 72)

1. Did not assessed FV in the unit of interest (*n*=18)
2. Bogart, L. M., Cowgill, B. O., Elliott, M. N., Klein, D. J., Hawes-Dawson, J., Uyeda, K., ... & Schuster, M. A. (2014). A randomized controlled trial of students for nutrition and eXercise: a community-based participatory research study. *Journal of Adolescent Health*, *55*(3), 415-422.
3. Straker, L. M., Howie, E. K., Smith, K. L., Fenner, A. A., Kerr, D. A., Olds, T. S., ... & Smith, A. J. (2014). The impact of Curtin University's activity, food and attitudes program on physical activity, sedentary time and fruit, vegetable and junk food consumption among overweight and obese adolescents: a waitlist controlled trial. *PloS one*, *9*(11), e111954.
4. Lana, A., Faya-Ornia, G., & López, M. L. (2014). Impact of a web-based intervention supplemented with text messages to improve cancer prevention behaviors among adolescents: Results from a randomized controlled trial. *Preventive medicine*, *59*, 54-59.
5. Neuenschwander, L. M., Abbott, A., & Mobley, A. R. (2013). Comparison of a web-based vs in-person nutrition education program for low-income adults. *Journal of the Academy of Nutrition and Dietetics*, *113*(1), 120-126.
6. Parekh, S., King, D., Boyle, F. M., & Vandelanotte, C. (2014). Randomized controlled trial of a computer-tailored multiple health behaviour intervention in general practice: 12-month follow-up results. *International Journal of Behavioral Nutrition and Physical Activity*, *11*(1), 41.
7. Oenema, A., Tan, F., & Brug, J. (2005). Short-term efficacy of a web-based computer-tailored nutrition intervention: main effects and mediators. *Annals of Behavioral Medicine*, *29*(1), 54-63.
8. Duncan, M., Vandelanotte, C., Kolt, G. S., Rosenkranz, R. R., Caperchione, C. M., George, E. S., ... & Noakes, M. (2014). Effectiveness of a web-and mobile phone-based intervention to promote physical activity and healthy eating in middle-aged males: randomized controlled trial of the ManUp study. *Journal of medical Internet research*, *16*(6).
9. Schweitzer, A. L., Ross, J. T., Klein, C. J., Lei, K. Y., & Mackey, E. R. (2016). An electronic wellness program to improve diet and exercise in college students: a pilot study. *JMIR research protocols*, *5*(1).
10. Storm, V., Dörenkämper, J., Reinwand, D. A., Wienert, J., De Vries, H., & Lippke, S. (2016). Effectiveness of a web-based computer-tailored multiple-lifestyle intervention for people interested in reducing their cardiovascular risk: a randomized controlled trial. *Journal of medical Internet research*, *18*(4).
11. Block, G., Sternfeld, B., Block, C. H., Block, T. J., Norris, J., Hopkins, D., ... & Clancy, H. A. (2008). Development of Alive!(A Lifestyle Intervention Via Email), and its effect on health-related quality of life, presenteeism, and other behavioral outcomes: randomized controlled trial. *Journal of medical Internet research*, *10*(4).
12. Kypri, K., & McAnally, H. M. (2005). Randomized controlled trial of a web-based primary care intervention for multiple health risk behaviors. *Preventive medicine*, *41*(3-4), 761-766.
13. Pedersen, S., Grønhøj, A., & Thøgersen, J. (2016). Texting your way to healthier eating? Effects of participating in a feedback intervention using text messaging on adolescents’ fruit and vegetable intake. *Health education research*, *31*(2), 171-184.
14. Brown, O. N., O’Connor, L. E., & Savaiano, D. (2014). Mobile MyPlate: a pilot study using text messaging to provide nutrition education and promote better dietary choices in college students. *Journal of American College Health*, *62*(5), 320-327.
15. Long, J. D., & Stevens, K. R. (2004). Using technology to promote self‐efficacy for healthy eating in adolescents. *Journal of Nursing Scholarship*, *36*(2), 134-139.
16. Hebden, L., Cook, A., Van Der Ploeg, H. P., King, L., Bauman, A., & Allman‐Farinelli, M. (2014). A mobile health intervention for weight management among young adults: a pilot randomised controlled trial. *Journal of Human Nutrition and Dietetics*, *27*(4), 322-332.
17. Mauriello, L. M., Ciavatta, M. M. H., Paiva, A. L., Sherman, K. J., Castle, P. H., Johnson, J. L., & Prochaska, J. M. (2010). Results of a multi-media multiple behavior obesity prevention program for adolescents. *Preventive medicine*, *51*(6), 451-456.
18. Oenema, A., Brug, J., & Lechner, L. (2001). Web-based tailored nutrition education: results of a randomized controlled trial. *Health education research*, *16*(6), 647-660.
19. Tessaro, I., Rye, S., Parker, L., Mangone, C., & McCrone, S. (2007). Effectiveness of a nutrition intervention with rural low-income women. *American journal of health behavior*, *31*(1), 35-43.
20. Experimental group did not classify as an eHealth-intervention (n=19)
21. Ball, K., McNaughton, S. A., Le, H. N., Abbott, G., Stephens, L. D., & Crawford, D. A. (2016). ShopSmart 4 Health: results of a randomized controlled trial of a behavioral intervention promoting fruit and vegetable consumption among socioeconomically disadvantaged women. *The American journal of clinical nutrition*, *104*(2), 436-445.
22. Brug, J., Steenhuis, I., van Assema, P., Glanz, K., & De Vries, H. (1999). Computer-tailored nutrition education: differences between two interventions. *Health Education Research*, *14*(2), 249-256.
23. Chang, M. W., Brown, R., & Nitzke, S. (2017). A Community‐Based Intervention Program's Effects on Dietary Intake Behaviors. *Obesity*, *25*(12), 2055-2061.
24. Gans, K. M., Risica, P. M., Dulin-Keita, A., Mello, J., Dawood, M., Strolla, L. O., & Harel, O. (2015). Innovative video tailoring for dietary change: final results of the Good for you! cluster randomized trial. *International Journal of Behavioral Nutrition and Physical Activity*, *12*(1), 130.
25. Kristal, A. R., Curry, S. J., Shattuck, A. L., Feng, Z., & Li, S. (2000). A randomized trial of a tailored, self-help dietary intervention: the Puget Sound Eating Patterns study. *Preventive Medicine*, *31*(4), 380-389.
26. Lin, C. Y., Scheerman, J. F., Yaseri, M., Pakpour, A. H., & Webb, T. L. (2017). A cluster randomised controlled trial of an intervention based on the Health Action Process Approach for increasing fruit and vegetable consumption in Iranian adolescents. *Psychology & health*, *32*(12), 1449-1468.
27. Luján, L. B., Navarro, A. A., Suárez, M. J., Betencourt, L. H., & Majem, L. S. (2003). Nontraditional nutrition education interventions: the radio ECCA method. *European journal of clinical nutrition*, *57*(S1), S86.
28. Pem, D., Bhagwant, S., & Jeewon, R. (2016). A pre and post survey to determine effectiveness of a dietitian-based nutrition education strategy on fruit and vegetable intake and energy intake among adults. *Nutrients*, *8*(3), 127.
29. Richards, A., Kattelmann, K. K., & Ren, C. (2006). Motivating 18-to 24-year-olds to increase their fruit and vegetable consumption. *Journal of the American Dietetic Association*, *106*(9), 1405-1411.
30. Shahril, M. R., Wan Dali, W. P. E., & Lua, P. L. (2013). A 10-week multimodal nutrition education intervention improves dietary intake among university students: cluster randomised controlled trial. *Journal of nutrition and metabolism*, *2013*.
31. Sorensen, G., Barbeau, E. M., Stoddard, A. M., Hunt, M. K., Goldman, R., Smith, A., ... & Wallace, L. (2007). Tools for health: the efficacy of a tailored intervention targeted for construction laborers. *Cancer Causes & Control*, *18*(1), 51-59.
32. Struempler, B. J., Parmer, S. M., Mastropietro, L. M., Arsiwalla, D., & Bubb, R. R. (2014). Changes in fruit and vegetable consumption of third-grade students in body quest: food of the warrior, a 17-class childhood obesity prevention program. *Journal of nutrition education and behavior*, *46*(4), 286-292.
33. Witt, K. E., & Dunn, C. (2012). Increasing fruit and vegetable consumption among preschoolers: evaluation of Color Me Healthy. *Journal of nutrition education and behavior*, *44*(2), 107-113.
34. Woodall, W. G., Buller, D. B., Saba, L., Zimmerman, D., Waters, E., Hines, J. M., ... & Starling, R. (2007). Effect of emailed messages on return use of a nutrition education website and subsequent changes in dietary behavior. *Journal of medical Internet research*, *9*(3).
35. Straker, L. M., Howie, E. K., Smith, K. L., Fenner, A. A., Kerr, D. A., Olds, T. S., ... & Smith, A. J. (2014). The impact of Curtin University's activity, food and attitudes program on physical activity, sedentary time and fruit, vegetable and junk food consumption among overweight and obese adolescents: a waitlist controlled trial. *PLoS One*, *9*(11), e111954.
36. Campbell, M. K., Tessaro, I., DeVellis, B., Benedict, S., Kelsey, K., Belton, L., & Sanhueza, A. (2002). Effects of a tailored health promotion program for female blue-collar workers: health works for women. *Preventive medicine*, *34*(3), 313-323.
37. Connell, D., Goldberg, J. P., & Folta, S. C. (2001). An intervention to increase fruit and vegetable consumption using audio communications: in-store public service announcements and audiotapes. *Journal of health communication*, *6*(1), 31-43.
38. Kebaili, R., Harrabi, I., Maatoug, J., Ghammam, R., Slim, S., & Ghannem, H. (2014). School-based intervention to promote healthy nutrition in Sousse, Tunisia. *International journal of adolescent medicine and health*, *26*(2), 253-258.
39. Heimendinger, J., O'Neill, C., Marcus, A. C., Wolfe, P., Julesburg, K., Morra, M., ... & Ward, J. D. (2005). Multiple tailored messages are effective in increasing fruit and vegetable consumption among callers to the Cancer Information Service. *Journal of health communication*, *10*(S1), 65-82.
40. Used same eHealth-tool for FVI in both groups, comparing a component of no interest for this study (n=12)
41. Park, A., Nitzke, S., Kritsch, K., Kattelmann, K., White, A., Boeckner, L., ... & Zhang, Z. (2008). Internet-based interventions have potential to affect short-term mediators and indicators of dietary behavior of young adults. *Journal of Nutrition Education and Behavior*, *40*(5), 288-297.
42. Tapper, K., Jiga-Boy, G., Maio, G. R., Haddock, G., & Lewis, M. (2014). Development and preliminary evaluation of an internet-based healthy eating program: randomized controlled trial. *Journal of medical Internet research*, *16*(10).
43. Alexander, G. L., McClure, J. B., Calvi, J. H., Divine, G. W., Stopponi, M. A., Rolnick, S. J., ... & Strecher, V. J. (2010). A randomized clinical trial evaluating online interventions to improve fruit and vegetable consumption. *American journal of public health*, *100*(2), 319-326.
44. Winett, R. A., Anderson, E. S., Wojcik, J. R., Winett, S. G., Moore, S., & Blake, C. (2010). Guide to health: a randomized controlled trial of the effects of a completely web-based intervention on physical activity, fruit and vegetable consumption, and body weight. *Translational behavioral medicine*, *1*(1), 165-174.
45. Fielden, A. L., Sillence, E., Little, L., & Harris, P. R. (2016). Online Self‐Affirmation Increases Fruit and Vegetable Consumption in Groups at High Risk of Low Intake. *Applied Psychology: Health and Well‐Being*, *8*(1), 3-18.
46. Kato-Lin, Y. C., Abhishek, V., Downs, J. S., & Padman, R. (2016). Food for Thought: The Impact of m-Health Enabled Interventions on Eating Behavior.
47. Keller, J., Motter, S., Motter, M., & Schwarzer, R. (2018). Augmenting fruit and vegetable consumption by an online intervention: Psychological mechanisms. *Appetite*, *120*, 348-355.
48. Springvloet, L., Lechner, L., de Vries, H., & Oenema, A. (2015). Long-term efficacy of a Web-based computer-tailored nutrition education intervention for adults including cognitive and environmental feedback: a randomized controlled trial. *BMC public health*, *15*(1), 1.
49. Rabbi, M., Pfammatter, A., Zhang, M., Spring, B., & Choudhury, T. (2015). Automated personalized feedback for physical activity and dietary behavior change with mobile phones: a randomized controlled trial on adults. *JMIR mHealth and uHealth*, *3*(2).
50. Schulz, D. N., Schneider, F., de Vries, H., van Osch, L. A., van Nierop, P. W., & Kremers, S. P. (2012). Program completion of a web-based tailored lifestyle intervention for adults: differences between a sequential and a simultaneous approach. *Journal of medical Internet research*, *14*(2).
51. Schulz, D. N., Kremers, S. P., Vandelanotte, C., Van Adrichem, M. J., Schneider, F., Candel, M. J., & de Vries, H. (2014). Effects of a web-based tailored multiple-lifestyle intervention for adults: a two-year randomized controlled trial comparing sequential and simultaneous delivery modes. *Journal of medical Internet research*, *16*(1).
52. Dickinson, W. P., Glasgow, R. E., Fisher, L., Dickinson, L. M., Christensen, S. M., Estabrooks, P. A., & Miller, B. F. (2013). Use of a website to accomplish health behavior change: if you build it, will they come? And will it work if they do?. *J Am Board Fam Med*, *26*(2), 168-176.
53. Did not report pre-post test means and/or SD (n=8)
54. Atienza, A. A., King, A. C., Oliveira, B. M., Ahn, D. K., & Gardner, C. D. (2008). Using hand-held computer technologies to improve dietary intake. *American journal of preventive medicine*, *34*(6), 514-518.
55. Block, G., Wakimoto, P., Mandel, R., Metz, D., Fujii, M. L., Feldman, N., & Sutherland, B. (2004). PEER REVIEWED: A Randomized Trial of the Little by Little CD-ROM: Demonstrated Effectiveness in Increasing Fruit and Vegetable Intake in a Low-income Population. *Preventing Chronic Disease*, *1*(3).
56. Chamberland, K., Sanchez, M., Panahi, S., Provencher, V., Gagnon, J., & Drapeau, V. (2017). The impact of an innovative web-based school nutrition intervention to increase fruits and vegetables and milk and alternatives in adolescents: a clustered randomized trial. *International Journal of Behavioral Nutrition and Physical Activity*, *14*(1), 140.
57. Mummah, S., Robinson, T. N., Mathur, M., Farzinkhou, S., Sutton, S., & Gardner, C. D. (2017). Effect of a mobile app intervention on vegetable consumption in overweight adults: a randomized controlled trial. *International Journal of Behavioral Nutrition and Physical Activity*, *14*(1), 125.
58. Kerr, D. A., Harray, A. J., Pollard, C. M., Dhaliwal, S. S., Delp, E. J., Howat, P. A., ... & Wright, J. L. (2016). The connecting health and technology study: a 6-month randomized controlled trial to improve nutrition behaviours using a mobile food record and text messaging support in young adults. International Journal of Behavioral Nutrition and Physical Activity, 13(1), 52.
59. Silva, C., Fassnacht, D. B., Ali, K., Gonçalves, S., Conceição, E., Vaz, A., ... & Machado, P. P. (2015). Promoting health behaviour in Portuguese children via Short Message Service: The efficacy of a text-messaging programme. *Journal of health psychology*, *20*(6), 806-815.
60. Delichatsios, H. K., Friedman, R. H., Glanz, K., Tennstedt, S., Smigelski, C., Pinto, B. M., ... & Gillman, M. W. (2001). Randomized trial of a “talking computer” to improve adults' eating habits. *American Journal of Health Promotion*, *15*(4), 215-224.
61. Stevens, V. J., Glasgow, R. E., Toobert, D. J., Karanja, N., & Smith, K. S. (2002). Randomized trial of a brief dietary intervention to decrease consumption of fat and increase consumption of fruits and vegetables. *American Journal of Health Promotion*, *16*(3), 129-134.
62. Reported dietary data different from FV (e.g. fat, dairy intake) (n=7)
63. Kroeze, W., Oenema, A., Campbell, M., & Brug, J. (2008). The efficacy of Web-based and print-delivered computer-tailored interventions to reduce fat intake: results of a randomized, controlled trial. *Journal of nutrition education and behavior*, *40*(4), 226-236.
64. De Bourdeaudhuij, I., Stevens, V., Vandelanotte, C., & Brug, J. (2007). Evaluation of an interactive computer-tailored nutrition intervention in a real-life setting. *Annals of Behavioral Medicine*, *33*(1), 39-48.
65. Jaimovich, S., Campos, C., Bustos, J., Campos, M. S., Lillo, V., Herrera, L. M., & Arellano, V. (2015). Efectos de una intervención on line en conductas de autocuidado asociadas a la alimentación. *Enfermería Global*, *14*(39), 72-83.
66. Hensleigh, K. E., Eddy, J. M., Wang, M. Q., Dennison, D., & Chaney, J. D. (2004). The Impact of a Computerized Dietary Assessment on Nutrition Knowledge. *International Electronic Journal of Health Education*, *7*, 43-49.
67. Peng, W. (2009). Design and evaluation of a computer game to promote a healthy diet for young adults. *Health communication*, *24*(2), 115-127.
68. Poddar, K. H., Hosig, K. W., Anderson, E. S., Nickols-Richardson, S. M., & Duncan, S. E. (2010). Web-based nutrition education intervention improves self-efficacy and self-regulation related to increased dairy intake in college students. *Journal of the American Dietetic Association*, *110*(11), 1723-1727.
69. Fraticelli, F., Marchetti, D., Polcini, F., Mohn, A. A., Chiarelli, F., Fulcheri, M., & Vitacolonna, E. (2016). Technology-based intervention for healthy lifestyle promotion in Italian adolescence. *Annali dell'Istituto superiore di sanita*, *52*(1), 123-127.
70. Did not use control group (n=4)
71. Elizondo-Montemayor, L., Gutiérrez, N. G., Moreno Sánchez, D. M., Monsiváis Rodríguez, F. V., Martínez, U., Nieblas, B., & Lamadrid-Zertuche, A. C. (2014). Intervención para promover hábitos saludables y reducir obesidad en adolescentes de preparatoria. *Estudios sociales (Hermosillo, Son.)*, *22*(43), 217-239.
72. Chung, A. E., Skinner, A. C., Hasty, S. E., & Perrin, E. M. (2017). Tweeting to health: a novel mHealth intervention using Fitbits and Twitter to foster healthy lifestyles. *Clinical pediatrics*, *56*(1), 26-32.
73. Griffin, J. B., Struempler, B., Funderburk, K., Parmer, S. M., Tran, C., & Wadsworth, D. D. (2018). My Quest, an Intervention Using Text Messaging to Improve Dietary and Physical Activity Behaviors and Promote Weight Loss in Low-Income Women. *Journal of nutrition education and behavior*, *50*(1), 11-18.
74. Rodgers, R. F., Pernal, W., Matsumoto, A., Shiyko, M., Intille, S., & Franko, D. L. (2016). Capitalizing on mobile technology to support healthy eating in ethnic minority college students. *Journal of American College Health*, *64*(2), 125-132.
75. Used data reported in another study (n=1)
76. Plaete, J., Crombez, G., Van der Mispel, C., Verloigne, M., Van Stappen, V., & De Bourdeaudhuij, I. (2016). Effect of the web-based intervention MyPlan 1.0 on self-reported fruit and vegetable intake in adults who visit general practice: a quasi-experimental trial. *Journal of medical Internet research*, *18*(2).
77. No pretest assessment (n=2)
78. Turnin, M. C., Tauber, M. T., Couvaras, O., Jouret, B., Bolzonella, C., Bourgeois, O., ... & Hanaire-Broutin, H. (2001). Evaluation of microcomputer nutritional teaching games in 1,876 children at school. *Diabetes and Metabolism*, *27*(4), 459-465.
79. Ahn, S. J., Johnsen, K., Moore, J., Brown, S., Biersmith, M., & Ball, C. (2016). Using virtual pets to increase fruit and vegetable consumption in children: a technology-assisted social cognitive theory approach. *Cyberpsychology, Behavior, and Social Networking*, *19*(2), 86-92.
80. Validation of an app to report FV intake (n=1)
81. Bissell, K., Conlin Maxwell, L., Zhang, X., Bie, B., & McLemore, D. (2017). Let go of my iPad: Testing the effectiveness of new media technologies to measure children’s food intake and health behaviors. *Mass Communication and Society*, *20*(4), 550-572.

**Table A1.** Search Strategy (sample strategy)

| **Database** | **Keyword Combination** | **Search number** |
| --- | --- | --- |
| **English Search** | | |
| **Pubmed** | Fruit* OR vegetable* OR diet OR dietary OR eating behavior OR food intake OR nutrition OR food habits [MeSH Terms] | #1 |
| Technology OR mobile OR eHealth OR computer* OR text message* OR SMS OR interactive OR Internet* OR IT OR smartphone OR application OR PDA OR iPod OR iPad OR tablet OR CD-ROM OR multimedia OR telemedicine[MeSH Terms] | #2 |
| Modification OR effectiveness OR intervention OR program OR RCT OR random* | #3 |
| #1 AND #2 | #4 |
| #3 AND #4 | #5 |
| #5 AND NOT patient* OR disease OR diabetes OR cardiovascular OR hypertension | #6 |
| #6 AND NOT (meta-analysis[Title] OR review[Title]) |  |
| diet, modification, technology, intervention | #7 |
| ehealth, nutrition, effectiveness | #8 |
| nutrition education, technology, intervention | #9 |
| mobile, effectiveness, food habits | #10 |
| food habits AND computer-based AND intervention | #11 |
| food habits, text messages, intervention | #12 |
| food habits, ehealth, intervention | #13 |
| food habits, mobile health, intervention | #14 |
| food habits, interactive program, intervention | #15 |
| food habits, mobile, effectiveness | #16 |
| food intake, ehealth, effectiveness | #17 |
| (fruit* OR vegetable* [Title/Abstract]) AND mobile AND program | #18 |
| (fruit* OR vegetable* [Title/Abstract]) AND mobile AND intervention | #19 |
| (fruit* OR vegetable* [Title/Abstract]) AND eHealth AND intervention | #20 |
| **Spanish Search** | | |
| **SciELO** | (ab:(fruta)) OR (ab:(verdura)) OR (ab:(dieta)) OR (ab:(dietario)) OR (ab:(ingesta alimentaria)) OR (ab:(habitos alimentarios)) OR (ab:(nutricion)) | #1 |
| (ab:(internet)) OR (ab:(ehealth)) OR (ab:(esalud)) OR (ab:(educacion)) OR (ab:(movil)) OR (ab:(tecnologia)) OR (ab:(computadora)) OR (ab:(computador)) OR (ab:(sms)) OR (ab:("mensaje de texto")) OR (ab:(tableta)) OR (ab:(multimedia)) OR (ab:(aplicacion)) | #2 |
| ((ab:(intervencion)) OR (ab:(programa)) OR (ab:(modificacion)) OR (ab:(efectividad)) OR (ab:(ensayo)) OR (aleatorizado) OR ("grupo control")) OR (ab:(eficiencia)) OR (ab:(efectividad)) | #3 |
| #1 AND #2 | #4 |
| #3 AND #4 | #5 |

**Table A1 *(continued)*.** Search Strategy (sample strategy)

|  | **Korean Search** |  |
| --- | --- | --- |
| **RISS** | (과일 OR 채소) 모바일 AND 중재 | #1 |
| (과일 OR 채소) 기술 AND 중재 | #2 |
| (과일 OR 채소) 이헬스 AND 중재 | #3 |
| (과일 OR 채소) 컴퓨터 AND 중재 | #4 |
| (과일 OR 채소) 문자 AND 중재 | #5 |
| (과일 OR 채소) SMS AND 중재 | #6 |
| (과일 OR 채소) 웹기반 AND 중재 |  |
| (과일 OR 채소) 온라인 AND 중재 | #7 |
| (과일 OR 채소) 스마트폰 AND 중재 | #8 |
| (과일 OR 채소) 앱 AND 중재 | #9 |
| (과일 OR 채소) eHealth AND 중재 | #10 |
| (과일 OR 채소) AND (기술 OR 모바일 OR 컴퓨터 OR SMS OR온라인 OR 스마트폰 OR 앱 OR eHealth) AND (중재 OR 효과 OR 프로그램 OR 영양교육) | #11 |
| (식행동) AND (기술 OR 모바일 OR 컴퓨터 OR SMS OR온라인 OR 스마트폰 OR 앱 OR eHealth) AND (중재 OR 효과 OR 프로그램 OR 영양교육) | #12 |
| (섭취) AND (기술 OR 모바일 OR 컴퓨터 OR SMS OR온라인 OR 스마트폰 OR 앱 OR eHealth) AND (중재 OR 효과 OR 프로그램 OR 영양교육) | #13 |
| (식습관) AND (기술 OR 모바일 OR 컴퓨터 OR SMS OR온라인 OR 스마트폰 OR 앱 OR eHealth) AND (중재 OR 효과 OR 프로그램 OR 영양교육) | #14 |

*Note:* Additionally, for the search in PUBMED results were filtered by articles published since 1999 and studies conducted in Humans.

**Table A2.** Behavior Change Technique definitions

| Item (technique) | Definition | Examples |
| --- | --- | --- |
| 1. Provide information on consequences of behavior in general | Informing the individual about the possible consequences of the given behavior in general, and not personalized for the individual’s characteristics. | Providing pamphlets with information about the consequences of a diet low in fruits and vegetables. |
| 1. Provide information on consequences of behavior to the individual | Informing about the benefits and/or consequences of performing or not performing a specific behavior, tailoring the characteristics of the individual or group. | Information to pregnant women on the benefits of consuming an adequate intake of folic acid. |
| 1. Provide normative information about others’ behavior | Providing information about other people’s behavior(s) among a particular population, and whether the behavior(s) is common or uncommon. | Providing information about the average intake of peers. |
| 1. Goal setting (behavior) | The individual is asked to set a behavioral change or behavior implementation, aimed to help to achieve an outcome. This technique does not refer to specifics about how, when, or where the behavior will be done. | Stop shopping unhealthy snacks. |
| 1. Goal setting (outcome) | The individual is asked to set a goal that can be obtained as a benefit of performing a specific behavior. This goal can be a result of one or more behaviors. | Lose weight, reduce blood glucose levels. |
| 1. Action planning | Different from techniques 5 and 6, this technique involves a specific plan of action for the set goal, including at least when (frequency or duration), and/or where to act. | Walking at least 30 minutes, 4 days a week, around the neighborhood. |
| 1. Barrier identification/problem solving | The individual is encouraged to identify the potential barriers to perform the given behavior, and identify contingence actions. | Barrier: eating sweets when feeling stressed.  Action: having healthy snacks at home instead of sweets. |
| 1. Set graded tasks | Set small goals, with a logical sequence over time or difficulty, that will help the individual to achieve to target behavior. | Reduce the consumption of soda from 5 glasses a day to 2 glasses a day in the first week. |
| 1. Prompt review of behavioral goals | A previously set behavioral goal is reviewed, and accordingly, modifications of goals and/or new strategies to achieve them are established. | The individual has started to consume water daily, but the amount is insufficient. Suggestions for increasing the daily consumption are provided. |
| 1. Prompt rewards contingent on effort or progress towards behavior | Using praise or rewards (including self-reward) for efforts made towards performing a behavioral goal or showing progress in a preparatory step. | Sending congratulatory messages to the individual for eating more vegetables than the day before. |

**Table A2 *(continued)*.** Behavior Change Technique definitions

| Item (technique) | Definition | Examples |
| --- | --- | --- |
| 1. Provide rewards contingent on successful behavior | Using praise or rewards (can be material) to reinforce an individual’s successful performance of the behavioral goal. This may include self-reward. | Providing monetary incentives to individuals who successfully quit smoking. |
| 16. Prompt self-monitoring of behavior | The individual is asked to keep track of the target behavior, and this must be a clear component of the intervention. | Keeping a diary of the frequency and quantity of fruits and vegetables consumption. |
| 19. Provide feedback on performance | Providing the individual information that might help to improve the target behavior, based on the individual’s recorded behavior. Comments on the individual’s performance and discrepancies in relation to other’s performance is also included. | If the goal is to reduce fat consumption, the individual might need feedback on adequate cooking techniques. |
| 21. Provide instruction on how to perform the behavior | Verbal or written instructions provided to the individual on how to perform the target or preparatory behavior. | Providing healthy meals recipes booklet. |
| 22. Model/Demonstrate the behavior | Opposite to technique 21, this technique involves *showing* to the individual how to perform the behavior. | Providing cooking classes. |
| 24. Environmental restructuring | The individual is encouraged to make changes to their environment that might contribute to the successful performance of the target behavior. | Get rid of all sweets at home. |
| 26. Prompt Practice | The individual is encouraged to put into practice the behavior of interest numerous times during the intervention. | The individual is asked to practice refusing unhealthy snacks as homework between sessions. |
| 28. Facilitate social comparison | Refers to enabling explicit comparisons with other’s behavioral performance. | Presenting testimonial videos to encourage the person to try the target behavior. |
| 29. Plan social support/social change | The individual is encouraged to make a plan on how to receive social support from other people in order to successfully perform the target behavior/outcome. | Making a contract with a friend who will commit to exercise together with him/her. |
| 35. Relapse prevention/coping planning | Refers to identifying situations that might prevent the individual from maintaining the changed behavior, and setting alternatives to prevent these situations. | Avoiding attending events where the individual will be exposed to other’s smoking. |

Note. Adapted from “A refined taxonomy of behavior change techniques to help people change their physical activity and healthy eating behaviours: the CALO-RE taxonomy” by S. Michie, 2011, *Psychology & health, 26*, p. 1479. Copyright 2011 by European Health Psychology Society.

**Figure A1.** Sample and intervention characteristics of studies included in the meta-analysis


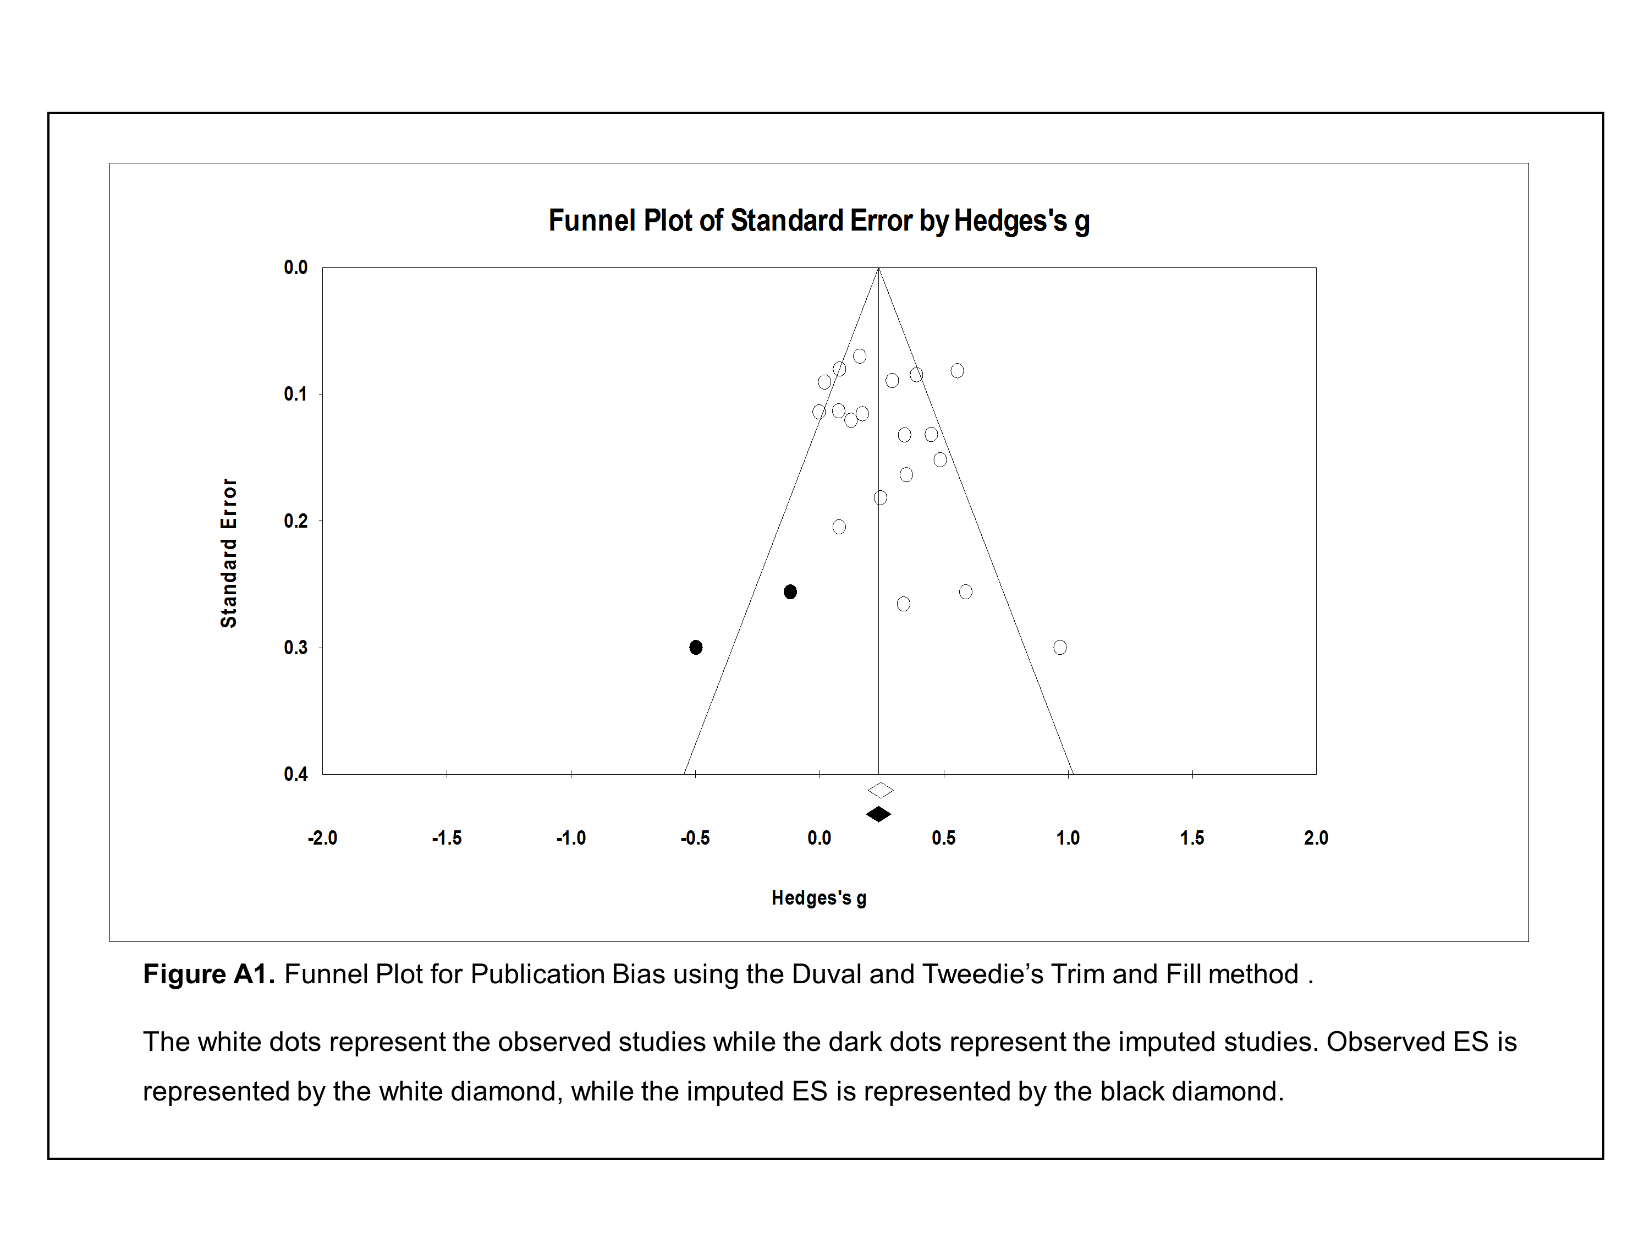

Supplement: Supplementary file 1 [file 16636673]
